# Supplementary material
Source: ML conference proceedings conference paper supplement (https://openreview.net/forum?id=RZGtK2nDDJ)
Supplement: supplementary_material [file attachment]

## A Implementation details

In this section, we provide the implementation details of MetaMAE, including architectures and hyperparameters for MetaMAE.

**Architectural details.** We summarize our architectures in Table 1, with the hyperparameter notation referred from [26]. We use token embedding for encoder inputs, and apply positional embedding to both encoder and decoder inputs, as suggested by [26]. Specifically, token embedding separates the input data into fixed-size tokens, while positional embedding uses a fixed, absolute position represented by a combination of sine and cosine functions. We describe the token size for each specific dataset in Appendix C.

Table 1: A Pytorch-like architecture description of MetaMAE.  $n \in \{2, 4, 6\}$ ,  $p \in \{0, 0.1\}$  are the hyperparameters.

| Component          | Layer descriptions                                                                                                                                      |
|--------------------|---------------------------------------------------------------------------------------------------------------------------------------------------------|
| Encoder $f_\theta$ | $\text{TransformerBlock}(d_{\text{model}} = 256, d_{\text{ff}} = 512, h = 8, P_{\text{drop}} = p, \text{GELU}, \text{LayerNorm}=\text{True}) \times 12$ |
| Decoder $g_\phi$   | $\text{TransformerBlock}(d_{\text{model}} = 128, d_{\text{ff}} = 256, h = 4, P_{\text{drop}} = 0, \text{GELU}, \text{LayerNorm}=\text{True}) \times n$  |
| Projector $h_\psi$ | $\text{Linear}(256, 1028), \text{BatchNorm1d}(1028), \text{Linear}(1028, 128)$                                                                          |

**Hyperparameter details.** We summarize our selected hyperparameters for each dataset in Table 2. We observe that a certain set of hyperparameters can generally work across modalities, e.g.,  $(\alpha, \lambda, \text{decoder depth}) = (0.5, 0.1, 4)$ , or can be shared within each modality, e.g.,  $P_{\text{drop}} = 0$  for Token modality. Table 3 demonstrates that MetaMAE with shared  $(\alpha, \lambda, \text{decoder depth})$  can outperform the previous results. However, we recommend specific values for each modality to improve the performance (refer to Appendix B for the hyperparameter sensitivity). We fix the temperature term for a contrastive loss  $\tau = 0.5$  and the Nearby- $S$  ratio  $r = 0.1$ . For latent adaptation, we update the latent representation using a single-step update, where the update magnitude is  $\alpha$ . Following [25], we train for 100k iterations for pretraining, and 100 epochs for linear evaluation. For pretraining, we use the AdamW optimizer [12] with both the learning rate and weight decay set to  $1e-4$ . For linear evaluation, we use the Adam optimizer [9], also with the learning rate and weight decay set to  $1e-4$ . The batch size used for both pretraining and linear evaluation is as described in [24, 25].

Table 2: Hyperparameters of MetaMAE for pretrain datasets.

| Modality                                    | Time-series | Tabular | MS Image | Token |      | Speech | RGB Image |            |
|---------------------------------------------|-------------|---------|----------|-------|------|--------|-----------|------------|
| Dataset                                     | PAMAP2      | HIGGS   | EuroSAT  | Genom | Pfam | Libri  | WaferMap  | ImageNet32 |
| <i>MetaMAE specific hyperparameters</i>     |             |         |          |       |      |        |           |            |
| $\alpha$                                    | 0.5         | 1.0     | 0.1      | 0.1   | 0.1  | 0.1    | 0.1       | 0.1        |
| $\lambda$                                   | 1.0         | 1.0     | 1.0      | 0.01  | 1.0  | 1.0    | 0.1       | 0.1        |
| decoder depth                               | 4           | 6       | 4        | 2     | 4    | 4      | 6         | 4          |
| $P_{\text{drop}}$                           | 0.1         | 0.1     | 0        | 0     | 0    | 0      | 0         | 0          |
| <i>Hyperparameters from DABS benchmarks</i> |             |         |          |       |      |        |           |            |
| mask ratio                                  | 0.85        | 0.50    | 0.85     | 0.50  | 0.15 | 0.85   | 0.85      | 0.85       |
| batch size                                  | 256         | 256     | 64       | 32    | 128  | 64     | 128       | 64         |

Table 3: Linear evaluation performance with the shared hyperparameters across modalities, viz., of  $(\alpha, \lambda, \text{decoder depth}) = (0.5, 0.1, 4)$ , compared to the previous best results reported.

| Modality                  | Time-series | Tabular     | MS Image    | Token       |             | Speech      | RGB Image   |
|---------------------------|-------------|-------------|-------------|-------------|-------------|-------------|-------------|
| Dataset                   | PAMAP2      | HIGGS       | EuroSAT     | Genom       | Pfam        | Libri       | WaferMap    |
| <i>Previous best</i> [25] | 85.3        | 70.0        | 86.3        | 53.6        | 54.7        | 60.2        | 93.9        |
| <b>MetaMAE (ours)</b>     | <b>89.1</b> | <b>71.0</b> | <b>88.5</b> | <b>55.4</b> | <b>62.2</b> | <b>77.1</b> | <b>95.4</b> |

## 22 B Analysis on hyperparameter sensitivity

23 We here provide more ablation experiments with varying hyperparameters  $\alpha$ ,  $\lambda$ , decoder depth,  
 24  $P_{\text{drop}}$ , and latent adaptation step size. Table 4, 5, 6, and 7 show the sensitivity of hyperparameters  
 25 on the PAMAP2 and WaferMap datasets. We observe that MetaMAE performs well even with  
 26 non-optimal hyperparameters, except for the decoder depth and  $P_{\text{drop}}$ , but we suggest finding better  
 27 hyperparameters specific to each domain (e.g.,  $\lambda = 0.1$  for WaferMap). Regarding the decoder depth,  
 28 we find that each modality requires an appropriate value, but generally, MetaMAE performs well  
 29 with a decoder depth of 4. In Table 8, we observe that single-step adaptation effectively achieves  
 30 good performance, and in some cases, even outperforms multiple-step adaptation due to the risk of  
 31 overly decoder-specific support representation.

Table 4: Sensitivity of  $\alpha$  on PAMAP2 and WaferMap.

| $\alpha$ | PAMAP2      | WaferMap    |
|----------|-------------|-------------|
| 0.1      | 86.2        | <b>95.5</b> |
| 0.5      | <b>89.3</b> | 95.4        |
| 1.0      | 89.1        | 95.2        |

Table 5: Sensitivity of  $\lambda$  on PAMAP2 and WaferMap.

| $\lambda$ | PAMAP2      | WaferMap    |
|-----------|-------------|-------------|
| 0.01      | 88.6        | 95.2        |
| 0.1       | <b>89.1</b> | <b>95.5</b> |
| 1.0       | <b>89.3</b> | 93.6        |

Table 6: Sensitivity of decoder depth on PAMAP2 and WaferMap.

| depth | PAMAP2      | WaferMap    |
|-------|-------------|-------------|
| 2     | 84.9        | 94.2        |
| 4     | <b>89.3</b> | <b>95.5</b> |
| 6     | 86.2        | <b>95.5</b> |

Table 7: Sensitivity of  $P_{\text{drop}}$  on PAMAP2 and WaferMap.

| $P_{\text{drop}}$ | PAMAP2      | WaferMap    |
|-------------------|-------------|-------------|
| 0                 | 79.4        | <b>95.5</b> |
| 0.1               | <b>89.3</b> | 94.7        |

Table 8: Sensitivity of latent adaptation step size on PAMAP2 and WaferMap.

| step size | PAMAP2      | WaferMap    |
|-----------|-------------|-------------|
| 1         | 89.3        | <b>95.5</b> |
| 5         | <b>89.6</b> | 94.9        |

## 32 C Dataset details

33 We provide a summary of the considered datasets from the DABS benchmarks [24, 25] in Table 9.  
 34 Note that we use the dataset split described in [24, 25].

Table 9: Datasets considered for pretraining and linear evaluation in our experiments. “MS Image” denotes the Multi-spectral image modality.

| Modality    | Dataset                     | # of classes | Input shape               | Token shape    |
|-------------|-----------------------------|--------------|---------------------------|----------------|
| Time-series | PAMAP2 [19]                 | 12           | $52 \times 320$           | 5              |
| Tabular     | HIGGS [18]                  | 2            | 28                        | 1              |
| MS Image    | EuroSAT [8, 7]              | 10           | $13 \times 64 \times 64$  | $8 \times 8$   |
| Token       | Genomics [20]               | 10           | $4 \times 250$            | 1              |
|             | Genomics-OOD [20]           | 60           | $4 \times 250$            | 1              |
|             | Pfam [5]                    | 623          | $26 \times 128$           | 1              |
|             | SCOP [6]                    | 1195         | $26 \times 128$           | 1              |
|             | Secondary Structure [10, 2] | 4            | $26 \times 128$           | 1              |
|             | Stability [21]              | -            | $26 \times 128$           | 1              |
|             | Fluorescence [22]           | -            | $26 \times 128$           | 1              |
| Speech      | LibriSpeech [17]            | 40           | $1 \times 224 \times 224$ | $16 \times 16$ |
|             | Audio MNIST [1]             | 10           | $1 \times 224 \times 224$ | $16 \times 16$ |
|             | Fluent Locations [13]       | 4            | $1 \times 224 \times 224$ | $16 \times 16$ |
|             | Fluent Actions [13]         | 6            | $1 \times 224 \times 224$ | $16 \times 16$ |
|             | Fluent Objects [13]         | 14           | $1 \times 224 \times 224$ | $16 \times 16$ |
|             | Google Speech [28]          | 36           | $1 \times 224 \times 224$ | $16 \times 16$ |
|             | VoxCeleb1 [15]              | 1251         | $1 \times 224 \times 224$ | $16 \times 16$ |
| RGB Image   | ImageNet-32 [4]             | 1000         | $3 \times 32 \times 32$   | $4 \times 4$   |
|             | CIFAR-10 [11]               | 10           | $3 \times 32 \times 32$   | $4 \times 4$   |
|             | CUB [27]                    | 200          | $3 \times 32 \times 32$   | $4 \times 4$   |
|             | VGG Flowers [16]            | 102          | $3 \times 32 \times 32$   | $4 \times 4$   |
|             | DTD [3]                     | 47           | $3 \times 32 \times 32$   | $4 \times 4$   |
|             | Traffic Sign [23]           | 43           | $3 \times 32 \times 32$   | $4 \times 4$   |
|             | AirCraft [14]               | 102          | $3 \times 32 \times 32$   | $4 \times 4$   |
|             | Wafer Map [29]              | 9            | $3 \times 32 \times 32$   | $4 \times 4$   |

## References

- [1] S. Becker, M. Ackermann, S. Lapuschkin, K.-R. Müller, and W. Samek. Interpreting and explaining deep neural networks for classification of audio signals. *CoRR*, abs/1807.03418, 2018.
- [2] H. M. Berman, J. Westbrook, Z. Feng, G. Gilliland, T. N. Bhat, H. Weissig, I. N. Shindyalov, and P. E. Bourne. The protein data bank. *Nucleic acids research*, 28(1):235–242, 2000.
- [3] M. Cimpoi, S. Maji, I. Kokkinos, S. Mohamed, and A. Vedaldi. Describing textures in the wild. In *CVPR*, pages 3606–3613, 2014.
- [4] J. Deng, W. Dong, R. Socher, L.-J. Li, K. Li, and L. Fei-Fei. Imagenet: A large-scale hierarchical image database. In *IEEE Conference on Computer Vision and Pattern Recognition*, 2009.
- [5] S. El-Gebali, J. Mistry, A. Bateman, S. R. Eddy, A. Luciani, S. C. Potter, M. Qureshi, L. Richardson, G. A. Salazar, A. Smart, E. L. L. Sonnhammer, L. Hirsh, L. Paladin, D. Piovesan, S. C. E. Tosatto, and R. D. Finn. The pfam protein families database in 2019. *Nucleic Acids Research*, 2019.
- [6] N. K. Fox, S. E. Brenner, and J.-M. Chandonia. Scope: Structural classification of proteins - extended, integrating scop and astral data and classification of new structures. *Nucleic Acids Research*, 2014.
- [7] P. Helber, B. Bischke, A. Dengel, and D. Borth. Introducing eurosat: A novel dataset and deep learning benchmark for land use and land cover classification. In *IGARSS 2018-2018 IEEE International Geoscience and Remote Sensing Symposium*, 2018.
- [8] P. Helber, B. Bischke, A. Dengel, and D. Borth. Eurosatsat: A novel dataset and deep learning benchmark for land use and land cover classification. *IEEE Journal of Selected Topics in Applied Earth Observations and Remote Sensing*, 2019.
- [9] D. P. Kingma and J. Ba. Adam: A method for stochastic optimization. In *International Conference on Learning Representations*, 2015.
- [10] M. S. Klausen, M. C. Jespersen, H. Nielsen, K. K. Jensen, V. I. Jurtz, C. K. Soenderby, M. O. A. Sommer, O. Winther, M. Nielsen, B. Petersen, et al. Netsurfp-2.0: Improved prediction of protein structural features by integrated deep learning. *Proteins: Structure, Function, and Bioinformatics*, 87(6):520–527, 2019.
- [11] A. Krizhevsky et al. Learning multiple layers of features from tiny images, 2009.
- [12] I. Loshchilov and F. Hutter. Decoupled weight decay regularization. In *International Conference on Learning Representations*, 2019.
- [13] L. Lugosch, M. Ravanelli, P. Ignoto, V. S. Tomar, and Y. Bengio. Speech model pre-training for end-to-end spoken language understanding. In G. Kubin and Z. Kacic, editors, *Proc. of Interspeech*, pages 814–818, 2019.
- [14] S. Maji, E. Rahtu, J. Kannala, M. Blaschko, and A. Vedaldi. Fine-grained visual classification of aircraft. *Technical report*, 2013.
- [15] A. Nagrani, J. S. Chung, and A. Zisserman. Voxceleb: a large-scale speaker identification dataset. In *INTERSPEECH*, 2017.
- [16] M.-E. Nilsback and A. Zisserman. Automated flower classification over a large number of classes. In *2008 Sixth Indian Conference on Computer Vision, Graphics & Image Processing*, pages 722–729. IEEE, 2008.
- [17] V. Panayotov, G. Chen, D. Povey, and S. Khudanpur. Librispeech: an asr corpus based on public domain audio books. In *IEEE International Conference on Acoustics, Speech and Signal Processing*, 2015.
- [18] P. S. Pierre Baldi and D. Whiteson. Searching for exotic particles in high-energy physics with deep learning. *Nature Communications* 5, 2014.

- 82 [19] A. Reiss and D. Stricker. Introducing a new benchmarked dataset for activity monitoring. In  
83 *16th International Symposium on Wearable Computers, ISWC*, 2012.
- 84 [20] J. Ren, P. J. Liu, E. Fertig, J. Snoek, R. Poplin, M. A. DePristo, J. V. Dillon, and B. Lak-  
85 shminarayanan. Likelihood ratios for out-of-distribution detection. In *Advances in Neural*  
86 *Information Processing Systems*, 2019.
- 87 [21] G. J. Rocklin, T. M. Chidyausiku, I. Goreshnik, A. Ford, S. Houliston, A. Lemak, L. Carter,  
88 R. Ravichandran, V. K. Mulligan, A. Chevalier, C. H. Arrowsmith, and D. Baker. Global  
89 analysis of protein folding using massively parallel design, synthesis, and testing. *Science*, 357  
90 (6347):168–175, jul 2017.
- 91 [22] K. S. Sarkisyan, D. A. Bolotin, M. V. Meer, D. R. Usmanova, A. S. Mishin, G. V. Sharonov,  
92 D. N. Ivankov, N. G. Bozhanova, M. S. Baranov, O. Soylemez, et al. Local fitness landscape of  
93 the green fluorescent protein. *Nature*, 533(7603):397–401, 2016.
- 94 [23] J. Stallkamp, M. Schlipsing, J. Salmen, and C. Igel. The german traffic sign recognition  
95 benchmark: a multi-class classification competition. In *The 2011 international joint conference*  
96 *on neural networks*, pages 1453–1460. IEEE, 2011.
- 97 [24] A. Tamkin, V. Liu, R. Lu, D. Fein, C. Schultz, and N. D. Goodman. Dabs: a domain-agnostic  
98 benchmark for self-supervised learning. In *Proceedings of the Neural Information Processing*  
99 *Systems Track on Datasets and Benchmarks 1, NeurIPS Datasets and Benchmarks*, 2021.
- 100 [25] A. Tamkin, G. Banerjee, M. Owda, V. Liu, S. Rammoorthy, and N. D. Goodman. Dabs  
101 2.0: Improved datasets and algorithms for universal self-supervision. In *Advances in Neural*  
102 *Information Processing Systems 35: Annual Conference on Neural Information Processing*  
103 *Systems 2022, NeurIPS*, 2022.
- 104 [26] A. Vaswani, N. Shazeer, N. Parmar, J. Uszkoreit, L. Jones, A. N. Gomez, L. Kaiser, and  
105 I. Polosukhin. Attention is all you need. In *Advances in Neural Information Processing Systems*,  
106 2017.
- 107 [27] C. Wah, S. Branson, P. Welinder, P. Perona, and S. Belongie. The caltech-ucsd birds-200-2011  
108 dataset. *Technical Report CNS-TR-2010-001*, 2010.
- 109 [28] P. Warden. Speech commands: A dataset for limited-vocabulary speech recognition. *arXiv*  
110 *preprint arXiv:1804.03209*, 2018.
- 111 [29] M.-J. Wu, J.-S. R. Jang, and J.-L. Chen. Wafer map failure pattern recognition and similarity  
112 ranking for large-scale data sets. *IEEE Transactions on Semiconductor Manufacturing*, 28(1):  
113 1–12, 2014.
